# Supplementary material for: The Association between Plasma Omega-6/Omega-3 Ratio and Anthropometric Traits Differs by Racial/Ethnic Groups and NFKB1 Genotypes in Healthy Young Adults
Source: PubMed Central journal article supplement (PMC6462983; doi:10.3390/jpm9010013), 2019-02-16
Supplement: jpm-09-00013-s001.pdf [file jpm-09-00013-s001.pdf]

**Supplementary Table 1.** Description of the polymorphisms in the *NFKB1* gene.

| dbSNP      | Position   | Reference<br>SNP<br>Allele |      | Genotype frequency |              |                |
|------------|------------|----------------------------|------|--------------------|--------------|----------------|
|            |            |                            |      | Homozygous         | Heterozygous | Homozygous     |
|            |            |                            |      | major<br>n (%)     | n (%)        | minor<br>n (%) |
| rs11722146 | Intron     | A/G                        | A    | GG                 | GA           | AA             |
|            |            |                            | 0.34 | 392 (43.7)         | 394 (43.9)   | 112 (12.5)     |
| rs13117745 | Intron     | C/T                        | T    | CC                 | CT           | TT             |
|            |            |                            | 0.12 | 701 (78.1)         | 177 (19.7)   | 20 (2.2)       |
| rs1609798  | Intron     | C/T                        | T    | CC                 | CT           | TT             |
|            |            |                            | 0.25 | 402 (44.8)         | 377 (42.0)   | 119 (13.3)     |
| rs4648022  | Intron     | C/T                        | T    | CC                 | CT           | TT             |
|            |            |                            | 0.05 | 811 (90.3)         | 81 (9.0)     | 6 (0.7)        |
| rs4648090  | Intron     | A/G                        | A    | GG                 | GA           | AA             |
|            |            |                            | 0.07 | 775 (86.3)         | 114 (12.7)   | 9 (1.0)        |
| rs1599961  | Intron     | A/G                        | A    | GG                 | GA           | AA             |
|            |            |                            | 0.38 | 361 (40.2)         | 398 (44.3)   | 139 (15.5)     |
| rs230511   | Intron     | A/G                        | A    | GG                 | GA           | AA             |
|            |            |                            | 0.36 | 379 (42.2)         | 396 (44.1)   | 123 (13.7)     |
| rs7674640  | Intergenic | C/T                        | C    | CC                 | CT           | TT             |
|            |            |                            | 0.49 | 230 (25.6)         | 450 (50.1)   | 218 (24.3)     |
| rs3774932  | Intron     | A/G                        | G    | AA                 | AG           | GG             |
|            |            |                            | 0.50 | 223 (24.8)         | 454 (50.6)   | 221 (24.6)     |

Position and reference SNP alleles are from dbSNP short genetics variations NCBI reference assembly.  
Abbreviations: MAF, minor allele frequency; SNP, single nucleotide polymorphism.

**Supplementary Table 2.** *NFKB1* genotype frequency by racial/ethnic groups.

| dbSNP      | Racial / ethnic group | Genotype frequency |              |                  | P       |
|------------|-----------------------|--------------------|--------------|------------------|---------|
|            |                       | Homozygous major   | Heterozygous | Homozygous minor |         |
|            |                       | n (%)              | n (%)        | n (%)            |         |
| rs11722146 |                       | GG                 | GA           | AA               | <0.0001 |
|            | C                     | 216 (24.1)         | 192 (21.4)   | 47 (5.2)         |         |
|            | EA                    | 115 (12.8)         | 167 (18.6)   | 56 (6.2)         |         |
|            | SA                    | 60 (6.7)           | 35 (3.9)     | 9 (1.0)          |         |
| rs13117745 |                       | CC                 | CT           | TT               | <0.0001 |
|            | C                     | 335 (37.4)         | 106 (11.8)   | 14 (1.6)         |         |
|            | EA                    | 298 (33.2)         | 38 (4.2)     | 2 (0.2)          |         |
|            | SA                    | 67 (7.5)           | 33 (3.7)     | 4 (0.5)          |         |
| rs1609798  |                       | CC                 | CT           | TT               | 0.0009  |
|            | C                     | 219 (24.4)         | 187 (20.9)   | 49 (5.5)         |         |
|            | EA                    | 124 (13.8)         | 156 (17.4)   | 58 (6.5)         |         |
|            | SA                    | 58 (6.5)           | 34 (3.8)     | 12 (1.3)         |         |

|           |    |            |            |            |         |
|-----------|----|------------|------------|------------|---------|
| rs4648022 |    | CC         | CT         | TT         | <0.0001 |
|           | C  | 382 (42.6) | 67 (7.5)   | 6 (0.7)    |         |
|           | EA | 338 (37.7) | 0 (0)      | 0 (0)      |         |
| rs4648090 |    | GG         | GA         | AA         | <0.0001 |
|           | C  | 349 (38.9) | 97 (10.8)  | 9 (1.0)    |         |
|           | EA | 334 (37.2) | 4 (0.5)    | 0 (0)      |         |
| rs1599961 |    | GG         | GA         | AA         | 0.03    |
|           | C  | 189 (21.1) | 195 (21.7) | 71 (7.9)   |         |
|           | EA | 117 (13.0) | 165 (18.4) | 56 (6.2)   |         |
| rs230511  |    | GG         | GA         | AA         | <0.0001 |
|           | C  | 209 (23.3) | 191 (21.9) | 55 (6.1)   |         |
|           | EA | 108 (12.0) | 170 (19.0) | 60 (6.7)   |         |
| rs7674640 |    | CC         | CT         | TT         | 0.48    |
|           | C  | 114 (12.7) | 236 (26.3) | 105 (11.7) |         |
|           | EA | 81 (9.0)   | 165 (18.4) | 92 (10.3)  |         |
| rs3774932 |    | AA         | AG         | GG         | 0.39    |
|           | C  | 123 (13.7) | 229 (25.5) | 103 (11.5) |         |
|           | EA | 74 (8.3)   | 171 (19.1) | 93 (10.4)  |         |
|           | SA | 24 (2.7)   | 54 (6.0)   | 26 (2.9)   |         |

---

*P* values were estimated using a Chi-squared test. Abbreviations: C, Caucasians; EA, East Asians; SA, South Asians.
